# Supplementary material for: A comparative study on the characterization of hepatitis B virus quasispecies by clone-based sequencing and third-generation sequencing
Source: PubMed Central journal article supplement (PMC5717089; doi:10.1038/emi.2017.88), 2017-11-08
Supplement: emi201788x1.pdf [file emi201788x1.pdf]

**Supplementary Table S1.** Primer pairs used for HBV full-length genome amplification

| <b>Primer Name</b> | <b>Sequence(5'-3')</b>                            | <b>Strand</b> | <b>Position in HBV genome</b> | <b>Sample Barcode</b> |
|--------------------|---------------------------------------------------|---------------|-------------------------------|-----------------------|
| C01                | 5'-CGCGCGTGTGTGCGTGTTCCTCA<br>CCTCTGCCTAATCA-3'   | Forward       | nt1821-nt1841                 | CGCGCGTG<br>TGTGCGTG  |
|                    | 5'-CACGCACACACGCGCGAAAAAGT<br>TGCATGGTGCTGG-3'    | Reverse       | nt1825-nt1806                 |                       |
| C02                | 5'-CACACGCGCGTGTGCTCGTTTTTCA<br>CCTCTGCCTAATCA-3' | Forward       | nt1821-nt1841                 | CACACGCG<br>CGTGCTCG  |
|                    | 5'-CGAGCACGCGCGTGTGAAAAAGT<br>TGCATGGTGCTGG-3'    | Reverse       | nt1825-nt1806                 |                       |
| C03                | 5'-ATCTGTGCGAGACTACTTTTTTCAC<br>CTCTGCCTAATCA-3'  | Forward       | nt1821-nt1841                 | ATCTGTGC<br>GAGACTAC  |
|                    | 5'-GTAGTCTCGCACAGATAAAAAAGTT<br>GCATGGTGCTGG-3'   | Reverse       | nt1825-nt1806                 |                       |
| S01                | 5'-ACGCGCACAGAGTCTCTTTTTTCAC<br>CTCTGCCTAATCA-3'  | Forward       | nt1821-nt1841                 | ACGCGCAC<br>AGAGTCTC  |
|                    | 5'-GAGACTCTGTGCGCGTAAAAAGT<br>TGCATGGTGCTGG-3'    | Reverse       | nt1825-nt1806                 |                       |
| S02                | 5'-TCTCTCACAGTCGAGCTTTTTTCAC<br>CTCTGCCTAATCA-3'  | Forward       | nt1821-nt1841                 | TCTCTACA<br>GTCGAGC   |
|                    | 5'-GCTCGACTGTGAGAGAAAAAGT<br>TGCATGGTGCTGG-3'     | Reverse       | nt1825-nt1806                 |                       |
| S03                | 5'-GTCATCACACATCTCTTTTTTCAC<br>CTCTGCCTAATCA-3'   | Forward       | nt1821-nt1841                 | GTCATCAC<br>ACATCTCT  |
|                    | 5'-AGAGATGTGTGATGACAAAAAGTT<br>GCATGGTGCTGG-3'    | Reverse       | nt1825-nt1806                 |                       |
| S04                | 5'-CTGATATGTAGTCGTATTTTTTCAC<br>CTCTGCCTAATCA-3'  | Forward       | nt1821-nt1841                 | CTGATATGT<br>AGTCGTA  |
|                    | 5'-TACGACTACATATCAGAAAAAGTT<br>GCATGGTGCTGG-3'    | Reverse       | nt1825-nt1806                 |                       |
| S05                | 5'-AGACTCTACAGAGATATTTTTTCAC<br>CTCTGCCTAATCA-3'  | Forward       | nt1821-nt1841                 | AGACTCTA<br>CAGAGATA  |
|                    | 5'-TATCTCTGTAGAGTCTAAAAAGTT<br>GCATGGTGCTGG-3'    | Reverse       | nt1825-nt1806                 |                       |
| S06                | 5'-GCGCATGTCTCTCTTTTTTCAC<br>CTCTGCCTAATCA-3'     | Forward       | nt1821-nt1841                 | GCGCATGT<br>CTCTCTCT  |
|                    | 5'-AGAGAGAGACATGCGCAAAAAAGT<br>TGCATGGTGCTGG-3'   | Reverse       | nt1825-nt1806                 |                       |
| S07                | 5'-TCTACAGAGCGAGAGTTTTTTTCAC<br>CTCTGCCTAATCA-3'  | Forward       | nt1821-nt1841                 | TCTACAGA<br>GCGAGAGT  |
|                    | 5'-ACTCTCGCTCTGTAGAAAAAGTT                        | Reverse       | nt1825-nt1806                 |                       |

|     |                                                 |         |               |          |
|-----|-------------------------------------------------|---------|---------------|----------|
|     | GCATGGTGCTGG-3'                                 |         |               |          |
| S08 | 5'-ACTACTGAGACATAGATTTTTCAC<br>CTCTGCCTAATCA-3' | Forward | nt1821-nt1841 | ACTACTGA |
|     | 5'-TCTATGTCTCAGTAGTAAAAAGTT<br>GCATGGTGCTGG-3'  | Reverse | nt1825-nt1806 | GACATAGA |
| S09 | 5'-CGCATGAGATATACGCTTTTTCAC<br>CTCTGCCTAATCA-3' | Forward | nt1821-nt1841 | CGCATGAG |
|     | 5'-GCGTATATCTCATGCGAAAAAGTT<br>GCATGGTGCTGG-3'  | Reverse | nt1825-nt1806 | ATATACGC |
| S10 | 5'-GTAGCGACATACGCACTTTTTCAC<br>CTCTGCCTAATCA-3' | Forward | nt1821-nt1841 | GTAGCGAC |
|     | 5'-GTGCGTATGTCGCTACAAAAAGTT<br>GCATGGTGCTGG-3'  | Reverse | nt1825-nt1806 | ATACGCAC |

---
