# Supplementary material for: A comparative study on the characterization of hepatitis B virus quasispecies by clone-based sequencing and third-generation sequencing
Source: PubMed Central journal article supplement (PMC5717089; doi:10.1038/emi.2017.88), 2017-11-08
Supplement: emi201788x2.pdf [file emi201788x2.pdf]

**Supplementary Table S2.** General information of enrolled patients

| Patient ID | Gender | Age (years) | HBV DNA (log10 copies/mL) | Genotype | ALT     | HBeAg status | Treatment | Treatment duration |
|------------|--------|-------------|---------------------------|----------|---------|--------------|-----------|--------------------|
| S01        | M      | 29          | 5.91                      | B        | 3287.2  | +            | ETV       | 2014.03-2014.12    |
| S02        | M      | 39          | 6.34                      | C        | 224.8   | +            | ETV       | 2014.1-2014.8      |
| S03        | M      | 46          | 8.23                      | B        | 304     | -            | LAM+ADV   | 2012.09.17-2015.11 |
| S04        | M      | 43          | 7.50                      | B        | 1052    | +            | IFN       | 2010-2014          |
| S05        | M      | 35          | 6.66                      | C        | 792     | +            | IFN       | 2009.01-2009.07    |
| S06        | M      | 28          | 7.05                      | B        | 1293    | +            | ETV       | 2005-2011          |
| S07        | M      | 40          | 7.26                      | C        | 332     | +            | LAM       | 2009-2011          |
|            |        |             |                           |          |         |              | ADV       | 2011-2014.08       |
| S08        | M      | 23          | 8.18                      | B        | 1150    | +            | IFN       | 2012.06-2013.12    |
| S09        | F      | 42          | 8.75                      | C        | 899     | -            | LAM       | 2012-2014.06       |
| S10        | F      | 39          | 6.55                      | C        | 600     | -            | LDT       | 2009.11-2011.03    |
|            |        |             |                           |          |         |              | ADV       | 2010.08-2011.03    |
| Mean       |        | 36.4        | 7.24                      |          | 993.40  |              |           |                    |
| ±SD        | 8/2    | ±7.46       | ±0.92                     | 5/5      | ±887.38 | 7/3          |           |                    |

# Abbreviations: +, positive; -, negative; ETV, Entecavir; LAM, Lamivudine; ADV, Adefovir Dipivoxil; IFN, Interferon alfa; LDT, Telbivudine
