# Supplementary material for: A comparative study on the characterization of hepatitis B virus quasispecies by clone-based sequencing and third-generation sequencing
Source: PubMed Central journal article supplement (PMC5717089; doi:10.1038/emi.2017.88), 2017-11-08
Supplement: emi201788x3.pdf [file emi201788x3.pdf]

**Supplementary Table S3.** Number of sequences generated by CBS and TGS

---

| <b>Sample</b> | <b>Number of sequences (CBS)</b> | <b>Number of sequences (TGS)</b> |
|---------------|----------------------------------|----------------------------------|
| C01           | 19                               | 697                              |
| C02           | 19                               | 747                              |
| C03           | 21                               | 799                              |
| S01           | 22                               | 459                              |
| S02           | 18                               | 378                              |
| S03           | 24                               | 222                              |
| S04           | 26                               | 245                              |
| S05           | 23                               | 780                              |
| S06           | 22                               | 563                              |
| S07           | 29                               | 816                              |
| S08           | 15                               | 220                              |
| S09           | 21                               | 798                              |
| S10           | 24                               | 560                              |

---
