# Supplementary material for: A comparative study on the characterization of hepatitis B virus quasispecies by clone-based sequencing and third-generation sequencing
Source: PubMed Central journal article supplement (PMC5717089; doi:10.1038/emi.2017.88), 2017-11-08
Supplement: emi201788x4.pdf [file emi201788x4.pdf]

**Supplementary Table S4.** Mutation profiles derived from CBS and TGS for each patient (S01-S05)

| Region | Mutation | S01    |        | S02    |        | S03  |        | S04    |        | S05    |        |
|--------|----------|--------|--------|--------|--------|------|--------|--------|--------|--------|--------|
|        |          | CBS    | TGS    | CBS    | TGS    | CBS  | TGS    | CBS    | TGS    | CBS    | TGS    |
| RT     | L180M    | -      | -      | -      | -      | -    | -      | -      | -      | -      | -      |
|        | A181T    | -      | -      | -      | 0.0185 | -    | -      | -      | -      | -      | 0.0128 |
|        | M204I    | -      | -      | -      | -      | -    | 0.0179 | -      | 0.0407 | -      | -      |
|        | V214A    | -      | -      | -      | 0.0237 | -    | -      | -      | -      | -      | -      |
|        | N236T    | -      | -      | -      | -      | -    | 0.0448 | -      | -      | -      | -      |
|        | M250I    | -      | -      | -      | -      | -    | 0.0269 | -      | 0.0163 | -      | -      |
| S      | P120T    | -      | -      | 0.3158 | 0.2269 | -    | -      | -      | -      | -      | -      |
|        | T126A    | -      | -      | -      | -      | -    | 0.0628 | -      | -      | -      | -      |
|        | T131N    | -      | -      | -      | -      | -    | -      | -      | -      | 0.125  | 0.0602 |
|        | M133T    | -      | -      | -      | -      | -    | -      | -      | -      | -      | -      |
|        | D144E    | -      | -      | 0.3684 | 0.3905 | -    | -      | -      | -      | -      | -      |
|        | G145R    | -      | -      | -      | 0.0396 | -    | -      | -      | -      | -      | -      |
| C      | L60V     | 0.913  | 0.9239 | -      | 0.0106 | 0.92 | 0.9327 | 0.8519 | 0.9512 | -      | -      |
|        | S87G     | -      | -      | -      | -      | -    | -      | -      | -      | -      | -      |
|        | L100     | -      | -      | -      | -      | -    | -      | -      | -      | -      | -      |
|        | P130T    | -      | -      | -      | -      | -    | -      | -      | -      | 0.8333 | 0.7977 |
|        | P135S    | -      | -      | 0.1579 | 0.0923 | -    | -      | 0.2222 | 0.2764 | -      | -      |
|        | P135Q    | -      | 0.0826 | -      | 0.058  | -    | 0.1121 | -      | 0.0285 | -      | -      |
|        | P135A    | -      | -      | -      | 0.0106 | 0.68 | 0.6502 | -      | -      | -      | -      |
| X      | C1653T   | -      | -      | 0.2105 | 0.2137 | -    | -      | -      | -      | -      | -      |
|        | T1674C   | -      | -      | -      | -      | -    | -      | -      | -      | -      | 0.0102 |
|        | T1674G   | -      | -      | -      | 0.0343 | -    | -      | -      | -      | -      | 0.0141 |
| PreC   | G1862T   | -      | -      | -      | -      | -    | -      | 0.0741 | 0.0569 | -      | 0.0569 |
|        | G1896A   | -      | 0.0174 | 0.1579 | 0.2322 | 0.92 | 0.9372 | 0.8519 | 0.9065 | -      | 0.9065 |
|        | G1899A   | -      | -      | -      | -      | -    | -      | 0.8148 | 0.9593 | -      | 0.9593 |
| BCP    | C1673T   | -      | -      | -      | 0.0422 | -    | -      | -      | -      | -      | -      |
|        | T1753C   | -      | -      | -      | -      | -    | -      | -      | -      | 0.2083 | 0.1204 |
|        | A1762T   | 0.9565 | 0.9478 | 0.2632 | 0.2322 | 0.68 | 0.8027 | 0.2222 | 0.2724 | -      | -      |
|        | G1764T   | -      | -      | 0.2105 | 0.0844 | -    | -      | -      | -      | -      | -      |
|        | C1766T   | -      | -      | -      | -      | 0.08 | 0.0942 | -      | -      | 0.0833 | 0.0691 |
|        | T1768A   | -      | -      | -      | -      | 0.08 | 0.0807 | -      | -      | -      | -      |
|        | C1799G   | -      | -      | -      | 0.029  | -    | -      | -      | -      | -      | -      |
|        | A1846T   | 0.0870 | 0.0217 | -      | 0.0132 | 0.92 | 0.9372 | 0.9259 | 0.9634 | -      | -      |

# Mutations detected by TGS and not detected by CBS were highlighted in blue background.

# Mutations not detected in patient samples were shown in hypen

**Supplementary Table S4 (cont'd)** Mutation profiles derived from CBS and TGS for each patient (S06-S10)

| Region | Mutation | S06    |        | S07    |        | S08    |        | S09    |        | S10    |        |
|--------|----------|--------|--------|--------|--------|--------|--------|--------|--------|--------|--------|
|        |          | CBS    | TGS    | CBS    | TGS    | CBS    | TGS    | CBS    | TGS    | CBS    | TGS    |
| RT     | L180M    | -      | -      | -      | 0.0196 | -      | -      | -      | 0.01   | -      | 0.0143 |
|        | A181T    | -      | -      | -      | -      | -      | -      | -      | -      | -      | -      |
|        | M204I    | -      | -      | 0.9667 | 0.9718 | -      | -      | 0.5000 | 0.4981 | 0.4    | 0.5651 |
|        | V214A    | -      | -      | -      | -      | -      | -      | -      | -      | -      | -      |
|        | N236T    | -      | -      | -      | -      | -      | -      | -      | -      | -      | -      |
|        | M250I    | -      | -      | -      | -      | -      | -      | -      | -      | -      | -      |
| S      | P120T    | -      | -      | -      | -      | -      | -      | -      | -      | -      | -      |
|        | T126A    | -      | -      | -      | -      | -      | -      | -      | -      | -      | -      |
|        | T131N    | -      | -      | -      | -      | -      | -      | 0.0263 | 0.08   | 0.0232 | -      |
|        | M133T    | -      | -      | -      | -      | -      | 0.0226 | -      | -      | -      | -      |
|        | D144E    | -      | -      | -      | -      | -      | -      | -      | -      | -      | -      |
|        | G145R    | -      | -      | -      | -      | -      | -      | -      | -      | -      | -      |
| C      | L60V     | 0.9565 | 0.9823 | -      | -      | -      | 0.0131 | -      | -      | -      | -      |
|        | S87G     | -      | -      | 0.9667 | 0.9767 | -      | -      | 0.5000 | 0.5019 | 0.4000 | 0.5668 |
|        | L100     | -      | -      | 0.7000 | 0.7087 | -      | -      | 0.3636 | 0.3617 | 0.3600 | 0.4171 |
|        | P130T    | -      | -      | -      | -      | -      | 0.0136 | 0.4091 | 0.3942 | 0.4400 | 0.3369 |
|        | P135S    | -      | 0.0106 | -      | -      | -      | -      | -      | -      | -      | -      |
|        | P135Q    | -      | -      | -      | -      | 0.3125 | 0.1991 | -      | -      | -      | -      |
|        | P135A    | -      | -      | -      | -      | -      | -      | -      | -      | -      | -      |
| X      | C1653T   | -      | -      | -      | -      | -      | -      | -      | -      | -      | -      |
|        | T1674C   | -      | -      | -      | -      | -      | -      | -      | -      | -      | -      |
|        | T1674G   | -      | -      | -      | -      | -      | 0.0181 | -      | 0.0113 | -      | -      |
| PreC   | G1862T   | -      | 0.0957 | -      | -      | -      | -      | -      | -      | -      | -      |
|        | G1896A   | 0.9130 | 0.9131 | 0.1667 | 0.2644 | 0.9375 | 0.9593 | 0.0909 | 0.1314 | -      | 0.1569 |
|        | G1899A   | 0.9565 | 0.9734 | -      | -      | -      | -      | -      | -      | -      | -      |
| BCP    | C1673T   | -      | -      | -      | -      | -      | -      | -      | -      | -      | -      |
|        | T1753C   | -      | -      | -      | -      | -      | -      | -      | 0.0613 | 0.0800 | 0.0553 |
|        | A1762T   | -      | 0.0142 | -      | -      | 0.3750 | 0.4751 | -      | -      | -      | -      |
|        | G1764T   | -      | -      | -      | -      | -      | -      | -      | -      | -      | -      |
|        | C1766T   | -      | -      | -      | -      | -      | -      | -      | 0.0375 | -      | 0.0321 |
|        | T1768A   | -      | -      | -      | -      | -      | -      | -      | -      | -      | -      |
|        | C1799G   | -      | -      | -      | -      | -      | -      | -      | -      | -      | -      |
|        | A1846T   | 0.9565 | 0.9787 | -      | -      | -      | -      | -      | -      | -      | 0.0107 |

# Mutations detected by TGS and not detected by CBS were highlighted in blue background.

# Mutations not detected in patient samples were shown in hypen
