# Supplementary material for: A comparative study on the characterization of hepatitis B virus quasispecies by clone-based sequencing and third-generation sequencing
Source: PubMed Central journal article supplement (PMC5717089; doi:10.1038/emi.2017.88), 2017-11-08
Supplement: emi201788x5.pdf [file emi201788x5.pdf]

**Supplementary Table S5.** Comparison of two methods for detection of mutations

| <b>TGS</b> | <b>CBS</b> |     | <b>Total</b> |
|------------|------------|-----|--------------|
|            | +          | -   |              |
| +          | 50         | 40  | 90           |
| -          | 0          | 240 | 240          |
| Total      | 50         | 280 | 330          |

# +:positive; -:negative
