# Supplementary material for: A comparative study on the characterization of hepatitis B virus quasispecies by clone-based sequencing and third-generation sequencing
Source: PubMed Central journal article supplement (PMC5717089; doi:10.1038/emi.2017.88), 2017-11-08
Supplement: emi201788x6.pdf [file emi201788x6.pdf]

**Supplementary Table S6.** Combination mutations detected by CBS and TGS for each patient (S01-S05).

| Region | Combination Mutation | S01    |        | S02    |        | S03    |        | S04    |        | S05    |        |
|--------|----------------------|--------|--------|--------|--------|--------|--------|--------|--------|--------|--------|
|        |                      | CBS    | TGS    | CBS    | TGS    | CBS    | TGS    | CBS    | TGS    | CBS    | TGS    |
| BCP    | A1762T/G1764A        | 1.0000 | 0.9434 | 0.2778 | 0.2222 | 0.6667 | 0.7748 | 0.2308 | 0.2694 | -      | 0.0051 |
|        | G1764[A/T]/C1766T    | -      | 0.0022 | 0.0556 | 0.0053 | -      | 0.0270 | -      | -      | 0.0870 | 0.0692 |
|        | C1766T/T1768A        | -      | -      | -      | -      | 0.0833 | 0.0856 | -      | -      | -      | -      |
| RT     | M204[I/V]/A181T      | -      | -      | 0.0556 | 0.0053 | -      | -      | -      | 0.0082 | -      | 0.0026 |
|        | N236K/A181T          | -      | -      | -      | 0.0026 | -      | -      | -      | -      | -      | -      |

# Combination Mutations detected by TGS and not detected by CBS were highlighted in blue background.

# Combination Mutations not detected in patient samples were shown in hyphen

**Supplementary Table S6 (cont'd).** Combination mutations detected by CBS and TGS for each patient (S06-S10).

| Region | Combination Mutation | S06 |        | S07 |        | S08    |        | S09    |        | S10    |        |
|--------|----------------------|-----|--------|-----|--------|--------|--------|--------|--------|--------|--------|
|        |                      | CBS | TGS    | CBS | TGS    | CBS    | TGS    | CBS    | TGS    | CBS    | TGS    |
| BCP    | A1762T/G1764A        | -   | 0.0142 | -   | 0.0037 | 0.4000 | 0.4227 | -      | 0.0025 | -      | 0.0036 |
|        | G1764[A/T]/C1766T    | -   | -      | -   | -      | -      | 0.0045 | 0.0476 | 0.0376 | 0.0417 | 0.0321 |
|        | C1766T/T1768A        | -   | 0.0018 | -   | -      | -      | 0.0045 | -      | -      | -      | -      |
| RT     | M204[I/V]/A181T      | -   | -      | -   | 0.0012 | -      | -      | -      | -      | -      | 0.0018 |
|        | N236K/A181T          | -   | -      | -   | -      | -      | -      | -      | -      | -      | -      |

# Combination Mutations detected by TGS and not detected by CBS were highlighted in blue background.

# Combination Mutations not detected in patient samples were shown in hyphen
