# Supplementary material for: A comparative study on the characterization of hepatitis B virus quasispecies by clone-based sequencing and third-generation sequencing
Source: PubMed Central journal article supplement (PMC5717089; doi:10.1038/emi.2017.88), 2017-11-08

**Supplementary Figure S1:** Sequence manipulation pipeline for the TGS data.

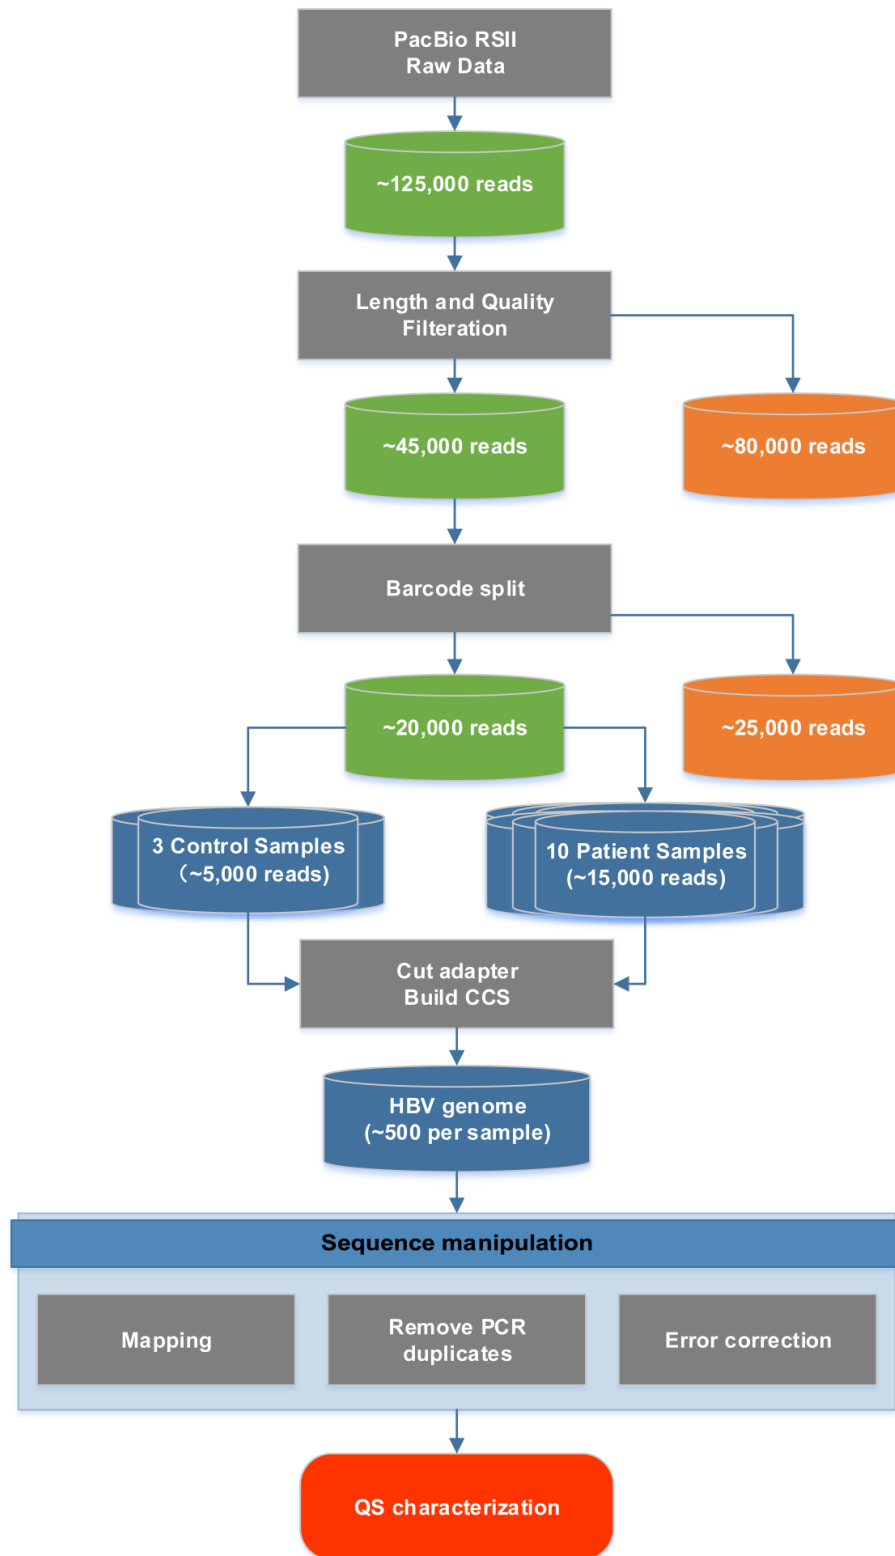

Supplement: emi201788x7.pdf [file emi201788x7.pdf]
