# Supplementary material for: A comparative study on the characterization of hepatitis B virus quasispecies by clone-based sequencing and third-generation sequencing
Source: PubMed Central journal article supplement (PMC5717089; doi:10.1038/emi.2017.88), 2017-11-08

**Supplementary Figure S3:** Scatter plot and line regression of HBV whole genome, BCP, C, P, PreC, PreS1, PreS2, RT, S, X QS complexity at nucleotide level (A) and amino acid level (B), genetic distance at nucleotide level (C) and amino acid level (D), dS (E) and dN (F) based on CBS and TGS data. P and  $R^2$  values of line regression analysis are indicated in the plots. (\*,  $P < 0.05$ )

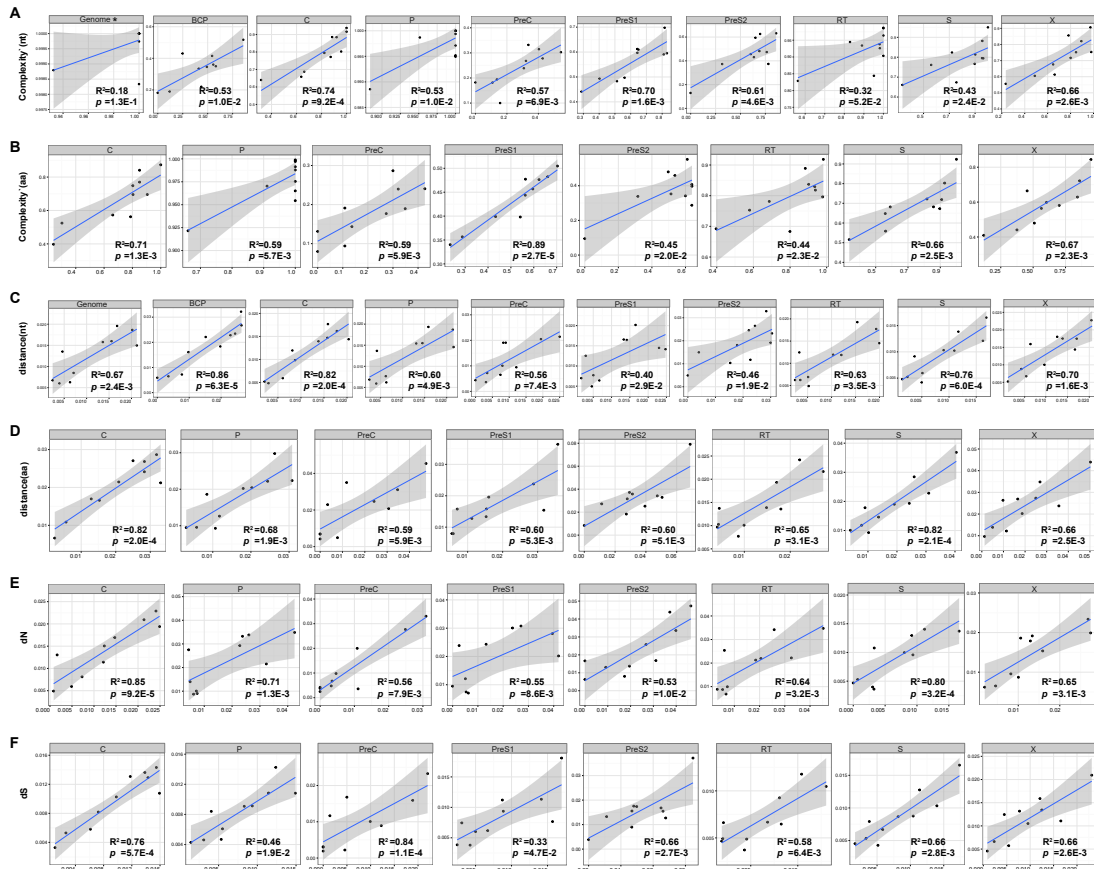

Supplement: emi201788x9.pdf [file emi201788x9.pdf]
